# Supplementary material for: Phylogeography of Dolichophis Populations in the Aegean Region (Squamata: Colubridae) with Taxonomic Remarks
Source: MDPI journal article supplement (doi:10.3390/d16030184), 2024-03-18
Supplement: s1 [file s1]

# Supplementary data Table S1

**Table S1.** Primers and PCR conditions used in this study, primers orientation (OR); F=forward, R= reverse.

| locus        | primer name | OR | primer sequence (5' - 3')   | primer sources | PCR conditions                 |
|--------------|-------------|----|-----------------------------|----------------|--------------------------------|
| <b>Cyt b</b> | H16064      | R  | CTTTGGTTTACAAGAACAATGCTTTA  | [55,56]        | 94°(2');94°(20''),48,5°(30''), |
|              | L14910      | F  | GACCTGTGATMTGAAAACCAACGTTGT | [55,56]        | 72° (75'') x 37;72°(10')       |
|              | L14919      | F  | AACCACCGTTGTTATTCAACT       | [55,56]        |                                |
| <b>C-mos</b> | S77         | F  | CATGGACTGGGATCAGTTATG       | [57]           | 94°(7');94°(40''),53°(30''),   |
|              | S78         | R  | CCTTGGGTGTGATTTTCTCACCT     | [57]           | 72° (60'') x 40;72°(7')        |
| <b>BDNF</b>  | BDNF_F1     | F  | ACCATCCTTTTCCTKACTATGG      | [58]           | 94°(2');94°(20''),57°(45''),   |
|              | BDNF_R1     | R  | CTATCTTCCCCTTTTAATGGTC      | [58]           | 72° (2') x 39;72°(10')         |
| <b>Rag1</b>  | R13         | F  | TCTGAATGGAAATTCAGCTGTT      | [59]           | 94°(2');94°(40''),55°(30''),   |
|              | R18         | R  | GATGCTGCCTCGGTCGGCCACCTTT   | [59]           | 72° (1') x 40;72°(5')          |
